# Supplementary material for: Reactivity of silica supported zirconium hydride towards N2O and CO2 probe molecules: a computational point of view
Source: Royal Society of Chemistry journal article supplement (doi:10.1039/c4nj00352g), 2014-01-01
Supplement: c4nj00352g2.pdf [file c4nj00352g2.pdf]

# Reactivity of silica supported zirconium hydride with N<sub>2</sub>O and CO<sub>2</sub> probe molecules: a computational point of view.

Mahboubeh Poor Kalhor,<sup>a</sup> Raphael Wischert,<sup>b†1</sup> Christophe Copéret,<sup>b,\*</sup> Henry  
Chermette,<sup>a,\*</sup>

<sup>a</sup> University of Lyon; Université Lyon 1(UCBL) and UMR CNRS 5280 Institut Sciences  
Analytiques, F-69622 Villeurbanne Cedex, France

<sup>b</sup> Department of Chemistry and Applied Biosciences, ETH Zürich, Vladimir Prelog Weg 2,  
CH-8093 Zürich, Switzerland.

## Cartesian coordinates of the structures

---

<sup>1</sup> †Present address: Eco-Efficient Products and Processes Laboratory (E2P2L), UMI 3464 CNRS – Solvay, 3966  
Jin Du Road, Xin Zhuang Ind. Zone, 201108 Shanghai, China.

### 1-H

|      |           |           |           |
|------|-----------|-----------|-----------|
| 1.Zr | 0.009288  | 0.001839  | 0.005833  |
| 2.O  | 1.996687  | -0.000383 | 0.000026  |
| 3.O  | -0.258514 | 1.968450  | 0.021483  |
| 4.O  | -0.253513 | -0.322320 | 1.949716  |
| 5.H  | -0.934846 | -1.048521 | -1.250713 |
| 6.Si | 0.627573  | 0.632498  | 3.001160  |
| 7.Si | 0.602851  | 2.826722  | 1.152953  |
| 8.Si | 2.765379  | 0.944577  | 1.143389  |
| 9.O  | 2.238912  | 0.459838  | 2.643830  |
| 10.O | 0.224155  | 2.213746  | 2.657655  |
| 11.O | 2.224605  | 2.506469  | 0.927006  |
| 12.O | 0.237620  | 4.408349  | 0.997326  |
| 13.O | 0.391325  | 0.244816  | 4.568021  |
| 14.O | 4.390322  | 0.835849  | 1.079334  |
| 15.H | 0.697243  | 5.016134  | 1.599364  |
| 16.H | 4.757430  | 0.500205  | 0.246614  |
| 17.H | -0.484271 | -0.115551 | 4.780898  |

### 2-H

|      |           |           |           |
|------|-----------|-----------|-----------|
| 1.Zr | 0.009904  | 0.012785  | 0.003305  |
| 2.O  | 1.971450  | -0.006736 | -0.005078 |
| 3.O  | -0.292212 | 1.946908  | -0.012990 |
| 4.Si | 3.076406  | 1.221381  | -0.113143 |
| 5.O  | 2.319962  | 2.684160  | -0.050964 |
| 6.Si | 0.766144  | 3.220646  | 0.040831  |
| 7.O  | 4.107712  | 1.239020  | 1.171714  |
| 8.O  | 3.839730  | 0.981898  | -1.554328 |
| 9.H  | 4.396371  | 1.718772  | -1.854852 |
| 10.H | 4.736870  | 0.499844  | 1.198678  |
| 11.O | 0.597719  | 4.214147  | -1.262343 |
| 12.O | 0.452673  | 3.968280  | 1.475813  |
| 13.H | 1.086996  | 4.658469  | 1.729419  |
| 14.H | -0.242137 | 4.699682  | -1.301580 |
| 15.H | -0.671062 | -0.753505 | -1.567616 |
| 16.H | -0.652412 | -0.752171 | 1.583263  |

### N2O

|     |           |          |          |
|-----|-----------|----------|----------|
| 1.N | 0.000371  | 0.000000 | 0.000000 |
| 2.N | 1.139008  | 0.000000 | 0.000000 |
| 3.O | -1.197713 | 0.000000 | 0.000000 |

### TS1 (= 1-H...ONN)

|      |           |           |           |
|------|-----------|-----------|-----------|
| 1.Zr | -0.670482 | 0.152090  | 0.142630  |
| 2.O  | 1.261385  | -0.366508 | -0.133679 |
| 3.Si | 2.383821  | 0.850378  | -0.289564 |

|      |           |           |           |
|------|-----------|-----------|-----------|
| 4.O  | 2.299600  | 1.772943  | 1.099493  |
| 5.Si | 0.866296  | 2.560497  | 1.416628  |
| 6.O  | 0.494130  | 3.423665  | 0.039643  |
| 7.Si | 0.475757  | 2.624962  | -1.423062 |
| 8.O  | 1.932855  | 1.837833  | -1.547065 |
| 9.O  | -0.726793 | 1.473999  | -1.353075 |
| 10.O | -0.987464 | -2.026760 | 0.208598  |
| 11.N | 0.046710  | -3.008760 | 0.112259  |
| 12.N | 0.394950  | -4.079036 | 0.133245  |
| 13.H | -2.318101 | -0.911124 | 0.377901  |
| 14.O | -0.311516 | 1.411051  | 1.632328  |
| 15.O | 3.895396  | 0.308825  | -0.590163 |
| 16.O | 0.933365  | 3.499375  | 2.749356  |
| 17.O | 0.287297  | 3.668450  | -2.664722 |
| 18.H | 1.547908  | 4.250308  | 2.708108  |
| 19.H | -0.561013 | 3.597337  | -3.130611 |
| 20.H | 4.144836  | -0.510574 | -0.134430 |

### 1-OH

|      |           |           |           |
|------|-----------|-----------|-----------|
| 1.Zr | -0.023841 | -0.017842 | -0.037813 |
| 2.O  | 1.978656  | -0.015442 | -0.021070 |
| 3.O  | -0.263750 | 1.957248  | 0.002564  |
| 4.O  | -0.273030 | -0.330798 | 1.925175  |
| 5.O  | -0.951912 | -1.203990 | -1.320802 |
| 6.Si | 0.586822  | 0.639951  | 2.970186  |
| 7.Si | 0.589060  | 2.824675  | 1.129887  |
| 8.Si | 2.735422  | 0.940702  | 1.112144  |
| 9.O  | 2.203442  | 0.473368  | 2.618823  |
| 10.O | 0.202026  | 2.226443  | 2.636172  |
| 11.O | 2.209223  | 2.506262  | 0.900569  |
| 12.O | 0.225870  | 4.407541  | 0.966427  |
| 13.O | 0.291499  | 0.298127  | 4.541561  |
| 14.O | 4.365441  | 0.858732  | 1.025026  |
| 15.H | 0.640889  | 5.005243  | 1.609604  |
| 16.H | 4.703710  | 0.236526  | 0.361288  |
| 17.H | -0.318138 | -0.442971 | 4.685748  |
| 18.H | -1.548624 | -1.193875 | -2.084266 |

### 2-H.N2O (= 2-H...ONN)

|      |           |           |           |
|------|-----------|-----------|-----------|
| 1.Zr | -0.103715 | 0.133093  | -0.009565 |
| 2.O  | 1.869277  | -0.041920 | -0.007288 |
| 3.O  | -0.211525 | 2.096530  | -0.017904 |
| 4.Si | 3.069570  | 1.086040  | -0.121543 |
| 5.O  | 2.450643  | 2.608986  | -0.068769 |
| 6.Si | 0.945378  | 3.272203  | 0.020453  |
| 7.O  | 4.106759  | 1.019747  | 1.158786  |
| 8.O  | 3.815413  | 0.770238  | -1.559147 |
| 9.H  | 4.427968  | 1.459627  | -1.864016 |
| 10.H | 4.688656  | 0.242259  | 1.166196  |
| 11.O | 0.870350  | 4.269756  | -1.289534 |

|      |           |           |           |
|------|-----------|-----------|-----------|
| 12.O | 0.710526  | 4.062541  | 1.447517  |
| 13.H | 1.405883  | 4.698092  | 1.683435  |
| 14.H | 0.069682  | 4.817120  | -1.336817 |
| 15.H | -0.909389 | -0.391085 | -1.618151 |
| 16.H | -0.881371 | -0.456627 | 1.591309  |
| 17.O | 0.205981  | -2.484799 | -0.141008 |
| 18.N | 1.313133  | -2.957218 | -0.067288 |
| 19.N | 2.352298  | -3.403739 | -0.006398 |

## TS2

|      |           |           |           |
|------|-----------|-----------|-----------|
| 1.Zr | -0.015824 | 0.027492  | -0.071845 |
| 2.O  | 1.950627  | -0.013709 | 0.046084  |
| 3.Si | 3.033017  | 1.234440  | 0.028599  |
| 4.O  | 2.260348  | 2.686801  | 0.109176  |
| 5.Si | 0.703319  | 3.225036  | 0.137377  |
| 6.O  | -0.360067 | 1.965667  | 0.035792  |
| 7.O  | 0.601540  | 4.229173  | -1.166561 |
| 8.O  | 0.342567  | 3.977380  | 1.558576  |
| 9.O  | 4.015248  | 1.224496  | 1.351853  |
| 10.O | 3.859533  | 1.060578  | -1.387605 |
| 11.O | -1.317831 | -1.582898 | -0.899786 |
| 12.N | -2.085618 | -2.621379 | -0.319770 |
| 13.N | -2.765593 | -3.516113 | -0.428223 |
| 14.H | -0.483820 | -0.432937 | -1.903588 |
| 15.H | -0.660114 | -0.711571 | 1.517133  |
| 16.H | 4.409266  | 1.821009  | -1.638335 |
| 17.H | 4.654648  | 0.493765  | 1.374385  |
| 18.H | 0.989822  | 4.640695  | 1.848808  |
| 19.H | -0.221260 | 4.742665  | -1.216247 |

## 2-(H)(OH)

|      |           |           |           |
|------|-----------|-----------|-----------|
| 1.Zr | 0.023106  | 0.019067  | -0.004867 |
| 2.O  | 1.999601  | 0.001876  | -0.029576 |
| 3.Si | 3.090424  | 1.243881  | -0.008105 |
| 4.O  | 2.358625  | 2.662596  | 0.408268  |
| 5.Si | 0.815986  | 3.236807  | 0.334139  |
| 6.O  | -0.233819 | 1.952448  | 0.330798  |
| 7.O  | 0.458861  | 4.237895  | 1.591846  |
| 8.H  | 0.118542  | 3.793532  | 2.385452  |
| 9.H  | -0.016383 | 4.720085  | -1.112333 |
| 10.O | 0.747008  | 4.123196  | -1.051361 |
| 11.H | 4.846957  | 0.290112  | 0.987355  |
| 12.O | 3.712048  | 1.294706  | -1.538564 |
| 13.H | 4.203144  | 2.105370  | -1.751747 |
| 14.O | -0.856099 | -0.642954 | -1.625117 |
| 15.H | -0.836026 | -0.585509 | -2.592452 |
| 16.H | -0.604671 | -0.954206 | 1.469869  |
| 17.O | 4.245521  | 1.035119  | 1.149084  |

### TS3

|      |           |           |           |
|------|-----------|-----------|-----------|
| 1.H  | 0.088238  | -0.093554 | 0.017209  |
| 2.O  | 1.831054  | 0.112559  | -0.019030 |
| 3.Zr | 0.474950  | 1.828196  | 0.018929  |
| 4.O  | -0.526438 | 2.459676  | -1.566334 |
| 5.Si | -0.168318 | 3.455048  | -2.828636 |
| 6.O  | -1.208353 | 4.728941  | -2.673927 |
| 7.O  | 2.168097  | 2.844036  | -0.404767 |
| 8.Si | 2.629819  | 3.752736  | -1.685781 |
| 9.O  | 3.901461  | 2.939211  | -2.364815 |
| 10.O | 1.402661  | 3.937670  | -2.773931 |
| 11.O | -0.306839 | 2.694888  | -4.286493 |
| 12.O | 3.027869  | 5.302908  | -1.274673 |
| 13.N | 3.234133  | 0.237100  | -0.225639 |
| 14.N | 4.227819  | -0.189300 | -0.538720 |
| 15.H | 3.800470  | 5.376464  | -0.691221 |
| 16.H | 4.225281  | 3.319541  | -3.197948 |
| 17.H | -1.215068 | 2.449249  | -4.526345 |
| 18.H | -1.022561 | 5.477999  | -3.263550 |
| 19.O | -0.210880 | 2.413442  | 1.763488  |
| 20.H | -0.751481 | 3.132473  | 2.125533  |

### 2-(OH)2

|      |           |           |           |
|------|-----------|-----------|-----------|
| 1.Zr | -0.009865 | -0.008916 | 0.063952  |
| 2.O  | 1.978547  | -0.013603 | 0.044357  |
| 3.Si | 3.067062  | 1.221783  | 0.002758  |
| 4.O  | 2.352605  | 2.660340  | 0.365834  |
| 5.Si | 0.803959  | 3.225422  | 0.336432  |
| 6.O  | -0.235745 | 1.943573  | 0.410121  |
| 7.O  | 0.500159  | 4.271277  | 1.575425  |
| 8.H  | 0.188362  | 3.852120  | 2.393874  |
| 9.H  | -0.062426 | 4.705452  | -1.088187 |
| 10.O | 0.679436  | 4.079404  | -1.067076 |
| 11.H | 4.816768  | 0.292250  | 1.030266  |
| 12.O | 3.668122  | 1.206318  | -1.539083 |
| 13.H | 4.221545  | 1.973102  | -1.762326 |
| 14.O | -0.787592 | -0.556603 | -1.658245 |
| 15.H | -0.597305 | -0.423079 | -2.599451 |
| 16.O | -0.741017 | -1.091901 | 1.549164  |
| 17.O | 4.243672  | 1.066663  | 1.150924  |
| 18.H | -1.387227 | -1.815332 | 1.562806  |

### 1-H.CO2

|      |           |           |           |
|------|-----------|-----------|-----------|
| 1.Zr | 0.064869  | -0.053299 | -0.025290 |
| 2.O  | 2.050926  | 0.005290  | -0.006899 |
| 3.Si | 2.828529  | 1.465143  | 0.013829  |
| 4.O  | -0.132899 | 1.210872  | -1.555733 |
| 5.Si | 0.700058  | 2.639984  | -1.473603 |

|      |           |           |           |
|------|-----------|-----------|-----------|
| 6.O  | -0.172396 | 1.227616  | 1.483011  |
| 7.Si | 0.649166  | 2.663939  | 1.400536  |
| 8.O  | 0.277241  | 3.405055  | -0.048556 |
| 9.O  | 2.330127  | 2.305114  | -1.340153 |
| 10.O | 2.282746  | 2.321836  | 1.337209  |
| 11.O | 0.248010  | 3.577876  | 2.695255  |
| 12.O | 4.444228  | 1.229393  | 0.057340  |
| 13.O | 0.354249  | 3.531897  | -2.797344 |
| 14.H | 4.985299  | 2.009833  | 0.258150  |
| 15.H | 0.870502  | 4.346901  | -2.904535 |
| 16.H | 0.607002  | 4.479209  | 2.708756  |
| 17.H | -0.588986 | -1.847694 | -0.010857 |
| 18.C | -3.027230 | -1.144136 | -0.003668 |
| 19.O | -2.540308 | -0.064322 | -0.051890 |
| 20.O | -3.587369 | -2.165014 | 0.042030  |

#### TS4

|      |           |           |           |
|------|-----------|-----------|-----------|
| 1.Zr | -0.013138 | 0.029133  | -0.027041 |
| 2.O  | 1.974457  | -0.003348 | -0.014941 |
| 3.Si | 2.829379  | 1.411487  | -0.004058 |
| 4.O  | -0.150360 | 1.317838  | -1.535186 |
| 5.Si | 0.744680  | 2.710954  | -1.451231 |
| 6.O  | -0.158966 | 1.309394  | 1.489439  |
| 7.Si | 0.729570  | 2.706177  | 1.420729  |
| 8.O  | 0.374925  | 3.481578  | -0.015984 |
| 9.O  | 2.356503  | 2.291396  | -1.341568 |
| 10.O | 2.344574  | 2.290916  | 1.329468  |
| 11.O | 0.382450  | 3.614217  | 2.731695  |
| 12.O | 4.426461  | 1.078430  | 0.008003  |
| 13.O | 0.416627  | 3.622954  | -2.764127 |
| 14.H | 5.023777  | 1.835366  | 0.119379  |
| 15.H | 0.906751  | 4.457347  | -2.839528 |
| 16.H | 0.830277  | 4.473361  | 2.788912  |
| 17.H | -0.735074 | -1.763933 | -0.035838 |
| 18.C | -2.724161 | -1.263005 | 0.017961  |
| 19.O | -2.502909 | -0.084886 | 0.023212  |
| 20.O | -3.220041 | -2.321602 | 0.020878  |

#### 1-\eta1-O2CH

|      |           |           |           |
|------|-----------|-----------|-----------|
| 1.Zr | 0.061781  | -0.149192 | -0.089680 |
| 2.O  | 2.042708  | -0.026362 | -0.033815 |
| 3.O  | -0.293242 | 1.804019  | -0.005536 |
| 4.O  | -0.083128 | -0.290196 | -2.062228 |
| 5.O  | 2.369992  | 0.678991  | -2.601733 |
| 6.Si | 0.754200  | 0.783250  | -3.009581 |
| 7.H  | 0.917784  | 0.980866  | -5.234626 |
| 8.O  | 0.272629  | 2.323326  | -2.584620 |
| 9.Si | 0.548897  | 2.815640  | -1.013342 |
| 10.O | 0.076709  | 4.350729  | -0.735251 |
| 11.H | 0.489498  | 5.041085  | -1.278952 |

|       |           |           |           |
|-------|-----------|-----------|-----------|
| 12.O  | 2.177506  | 2.572992  | -0.735476 |
| 13.Si | 2.805909  | 1.055812  | -1.034960 |
| 14.O  | 4.413827  | 0.977006  | -0.781881 |
| 15.H  | 4.950596  | 1.669622  | -1.199060 |
| 16.O  | -0.987667 | -1.477445 | 0.991732  |
| 17.C  | -1.532249 | -2.426769 | 1.786039  |
| 18.O  | -1.692308 | -2.319291 | 2.978628  |
| 19.H  | -1.819728 | -3.323235 | 1.205166  |
| 20.O  | 0.471852  | 0.424031  | -4.575195 |

### TS5

|      |           |           |           |
|------|-----------|-----------|-----------|
| 1.Zr | -0.036673 | 0.028750  | 0.067480  |
| 2.O  | 1.947174  | 0.024719  | 0.046494  |
| 3.Si | 2.759594  | 1.472002  | 0.035420  |
| 4.O  | 2.239089  | 2.351270  | -1.285614 |
| 5.Si | 0.618882  | 2.756137  | -1.348739 |
| 6.O  | 0.277056  | 3.518521  | 0.094765  |
| 7.Si | 0.658715  | 2.725298  | 1.514009  |
| 8.O  | 2.270823  | 2.316164  | 1.386783  |
| 9.O  | -0.258123 | 1.349586  | -1.397856 |
| 10.O | -0.216445 | 1.317499  | 1.568365  |
| 11.O | -0.951616 | -1.759226 | 0.020170  |
| 12.C | -1.587179 | -2.949957 | 0.100708  |
| 13.H | -0.880350 | -3.794879 | -0.026958 |
| 14.O | -2.774747 | -3.088602 | 0.263512  |
| 15.O | 4.367376  | 1.202108  | 0.007900  |
| 16.O | 0.242909  | 3.658048  | -2.653362 |
| 17.O | 0.323141  | 3.610909  | 2.840250  |
| 18.H | 4.907795  | 1.887800  | -0.416558 |
| 19.H | 0.780995  | 4.451777  | -2.802714 |
| 20.H | 0.698491  | 4.505616  | 2.869945  |

### 1-\eta<sup>2</sup>-O2CH

|       |           |           |           |
|-------|-----------|-----------|-----------|
| 1.Zr  | 0.061781  | -0.149192 | -0.089680 |
| 2.O   | 2.042708  | -0.026362 | -0.033815 |
| 3.O   | -0.293242 | 1.804019  | -0.005536 |
| 4.O   | -0.083128 | -0.290196 | -2.062228 |
| 5.O   | 2.369992  | 0.678991  | -2.601733 |
| 6.Si  | 0.754200  | 0.783250  | -3.009581 |
| 7.H   | 0.917784  | 0.980866  | -5.234626 |
| 8.O   | 0.272629  | 2.323326  | -2.584620 |
| 9.Si  | 0.548897  | 2.815640  | -1.013342 |
| 10.O  | 0.076709  | 4.350729  | -0.735251 |
| 11.H  | 0.489498  | 5.041085  | -1.278952 |
| 12.O  | 2.177506  | 2.572992  | -0.735476 |
| 13.Si | 2.805909  | 1.055812  | -1.034960 |
| 14.O  | 4.413827  | 0.977006  | -0.781881 |
| 15.H  | 4.950596  | 1.669622  | -1.199060 |
| 16.O  | -0.987667 | -1.477445 | 0.991732  |
| 17.C  | -1.532249 | -2.426769 | 1.786039  |

|      |           |           |           |
|------|-----------|-----------|-----------|
| 18.O | -1.692308 | -2.319291 | 2.978628  |
| 19.H | -1.819728 | -3.323235 | 1.205166  |
| 20.O | 0.471852  | 0.424031  | -4.575195 |

### 2-H.CO2

|      |           |           |           |
|------|-----------|-----------|-----------|
| 1.Si | 0.061735  | -0.036747 | -0.027211 |
| 2.O  | 1.704658  | -0.031275 | -0.179234 |
| 3.O  | -0.560987 | 1.489473  | 0.064232  |
| 4.O  | -0.446963 | -0.795078 | 1.347515  |
| 5.O  | -0.469260 | -0.808036 | -1.382334 |
| 6.Si | -1.486172 | -0.436293 | -2.623156 |
| 7.O  | -2.159434 | 1.054438  | -2.392686 |
| 8.Zr | -1.865486 | 2.459283  | -1.052151 |
| 9.O  | -0.685800 | -0.337203 | -4.061689 |
| 10.O | -2.616977 | -1.636413 | -2.599563 |
| 11.H | -3.552125 | 2.720188  | -0.238934 |
| 12.H | -1.096081 | 3.888916  | -1.986281 |
| 13.H | -3.238157 | -1.622913 | -3.345767 |
| 14.H | -0.103863 | -1.088938 | -4.259680 |
| 15.H | 2.181811  | 0.289111  | 0.603232  |
| 16.H | -0.287999 | -1.752835 | 1.368389  |
| 17.O | -1.693019 | 4.363317  | 0.751998  |
| 18.C | -2.696088 | 4.680398  | 1.292220  |
| 19.O | -3.669496 | 4.988676  | 1.852916  |

### TS6

|      |           |           |           |
|------|-----------|-----------|-----------|
| 1.Zr | -0.045457 | 0.048510  | 0.004643  |
| 2.O  | 1.922453  | -0.005369 | 0.010107  |
| 3.O  | -0.252303 | 2.003103  | 0.036462  |
| 4.Si | 3.064855  | 1.181636  | -0.108207 |
| 5.O  | 2.363472  | 2.669335  | -0.171528 |
| 6.Si | 0.837430  | 3.243695  | 0.062855  |
| 7.O  | 4.039187  | 1.242596  | 1.220536  |
| 8.O  | 3.887852  | 0.842197  | -1.495029 |
| 9.H  | 4.536122  | 1.513601  | -1.763901 |
| 10.H | 4.577391  | 0.448024  | 1.368728  |
| 11.O | 0.612344  | 4.299736  | -1.180697 |
| 12.O | 0.655836  | 3.943621  | 1.544120  |
| 13.H | 1.362870  | 4.559474  | 1.797056  |
| 14.H | -0.181744 | 4.852938  | -1.102538 |
| 15.H | -0.835956 | -0.454367 | -1.654642 |
| 16.H | -0.784906 | -0.525162 | 1.622470  |
| 17.O | -0.128113 | -2.439318 | -0.325322 |
| 18.C | -0.573912 | -2.589442 | -1.423529 |
| 19.O | -0.978814 | -2.961676 | -2.453224 |

### 2-(H)(\eta1-O2CH)

|      |           |          |          |
|------|-----------|----------|----------|
| 1.Si | -0.000035 | 0.000043 | 0.000011 |
| 2.O  | 1.642856  | 0.000071 | 0.000053 |



|      |           |           |           |
|------|-----------|-----------|-----------|
| 3.O  | -0.615587 | 1.541376  | -0.000046 |
| 4.O  | -0.667160 | -0.712743 | 1.322895  |
| 5.O  | -0.404729 | -0.770696 | -1.397031 |
| 6.Si | -1.441567 | -0.487498 | -2.642921 |
| 7.O  | -2.076583 | 1.042705  | -2.535581 |
| 8.Zr | -1.764931 | 2.489600  | -1.260800 |
| 9.O  | -0.675526 | -0.519548 | -4.095653 |
| 10.O | -2.611538 | -1.631848 | -2.478100 |
| 11.H | -3.393236 | 2.783840  | -0.399525 |
| 12.O | -0.666360 | 4.054644  | -2.128328 |
| 13.H | -3.298020 | -1.628738 | -3.165247 |
| 14.H | -0.111821 | -1.293355 | -4.259067 |
| 15.H | 2.059642  | 0.373872  | 0.793388  |
| 16.H | -0.580305 | -1.678839 | 1.370172  |
| 17.C | -1.530102 | 5.050095  | -2.046354 |
| 18.O | -1.424955 | 6.202540  | -2.400779 |
| 19.H | -2.517438 | 4.739069  | -1.536418 |

### TS7

|      |           |           |           |
|------|-----------|-----------|-----------|
| 1.Si | 0.186281  | -0.023869 | -0.171429 |
| 2.O  | 1.814245  | -0.115733 | -0.376280 |
| 3.O  | -0.344732 | 1.547281  | -0.113825 |
| 4.O  | -0.342690 | -0.694789 | 1.234711  |
| 5.O  | -0.436326 | -0.775562 | -1.496448 |
| 6.Si | -1.661232 | -0.473870 | -2.552226 |
| 7.O  | -2.214523 | 1.076858  | -2.350714 |
| 8.Zr | -1.658295 | 2.531916  | -1.171342 |
| 9.O  | -1.161559 | -0.537946 | -4.116690 |
| 10.O | -2.810946 | -1.590331 | -2.178555 |
| 11.H | -3.097711 | 2.876841  | -0.036635 |
| 12.O | -0.713366 | 4.071636  | -2.213642 |
| 13.H | -3.575576 | -1.617612 | -2.776513 |
| 14.H | -0.699217 | -1.350445 | -4.380100 |
| 15.H | 2.342161  | 0.147161  | 0.395488  |
| 16.H | -0.289863 | -1.663629 | 1.279893  |
| 17.C | -1.536856 | 5.094716  | -2.028029 |
| 18.O | -1.432363 | 6.230995  | -2.430597 |
| 19.H | -2.451442 | 4.816583  | -1.392189 |

### 2-(H)(\eta<sup>2</sup>-O<sub>2</sub>CH)

|      |           |           |           |
|------|-----------|-----------|-----------|
| 1.Si | 0.001879  | 0.001671  | -0.000838 |
| 2.O  | 1.649943  | -0.002635 | -0.007303 |
| 3.O  | -0.606402 | 1.540286  | -0.004552 |
| 4.O  | -0.641860 | -0.713058 | 1.335036  |
| 5.O  | -0.410836 | -0.792189 | -1.383098 |
| 6.Si | -1.251704 | -0.445517 | -2.755505 |
| 7.O  | -1.943480 | 1.054826  | -2.659867 |
| 8.Zr | -1.759452 | 2.458593  | -1.301352 |
| 9.O  | -0.267032 | -0.364431 | -4.074597 |

|      |           |           |           |
|------|-----------|-----------|-----------|
| 10.O | -2.375962 | -1.644031 | -2.854372 |
| 11.H | -3.409030 | 2.390547  | -0.452397 |
| 12.O | -0.492808 | 4.089086  | -2.145950 |
| 13.H | -2.907527 | -1.638056 | -3.667023 |
| 14.H | 0.336148  | -1.117576 | -4.185768 |
| 15.H | 2.059080  | 0.309385  | 0.816213  |
| 16.H | -0.531435 | -1.676703 | 1.382629  |
| 17.C | -1.381811 | 4.991811  | -1.923031 |
| 18.H | -1.165977 | 6.037804  | -2.202594 |
| 19.O | -2.485783 | 4.678168  | -1.391314 |

**2-(H)(\eta<sup>2</sup>-O<sub>2</sub>CH).CO<sub>2</sub>**

|      |           |           |           |
|------|-----------|-----------|-----------|
| 1.Si | 0.000002  | -0.016642 | 0.000550  |
| 2.O  | 1.649491  | -0.027630 | -0.006112 |
| 3.O  | -0.613334 | 1.512370  | 0.003000  |
| 4.O  | -0.637917 | -0.754509 | 1.332419  |
| 5.O  | -0.418485 | -0.800259 | -1.388844 |
| 6.Si | -1.381330 | -0.413789 | -2.665743 |
| 7.O  | -2.142726 | 1.026713  | -2.400368 |
| 8.Zr | -2.011606 | 2.437032  | -1.042304 |
| 9.O  | -0.519109 | -0.195541 | -4.054586 |
| 10.O | -2.452147 | -1.664399 | -2.763985 |
| 11.C | -4.405687 | 2.812613  | -0.034180 |
| 12.H | -1.076012 | 3.836239  | -1.893927 |
| 13.H | -3.009499 | -1.658030 | -3.559149 |
| 14.H | 0.111251  | -0.904654 | -4.261176 |
| 15.H | 2.058282  | 0.235682  | 0.834048  |
| 16.H | -0.521067 | -1.718255 | 1.361297  |
| 17.O | -4.164583 | 3.175304  | -1.234239 |
| 18.O | -3.484301 | 2.311083  | 0.688938  |
| 19.H | -5.419135 | 2.937173  | 0.383118  |
| 20.O | -1.708477 | 4.586375  | 0.472661  |
| 21.C | -1.133288 | 5.430774  | -0.129287 |
| 22.O | -0.579692 | 6.326716  | -0.629072 |

**2-(H)(\eta<sup>2</sup>-O<sub>2</sub>CH)(\eta<sup>1</sup>-O<sub>2</sub>CH)**

|      |           |           |           |
|------|-----------|-----------|-----------|
| 1.Zr | 0.089964  | -0.012050 | -0.492643 |
| 2.O  | 2.064114  | 0.024030  | -0.480802 |
| 3.Si | 3.212816  | 1.192455  | -0.303948 |
| 4.O  | 2.523630  | 2.573626  | 0.288517  |
| 5.Si | 0.975948  | 3.010886  | 0.656588  |
| 6.O  | -0.073884 | 1.833671  | 0.169468  |
| 7.O  | 3.838824  | 1.415313  | -1.813717 |
| 8.H  | 4.480351  | 2.140243  | -1.889206 |
| 9.O  | 4.353782  | 0.795621  | 0.817539  |
| 10.H | 4.912714  | 0.036436  | 0.584020  |
| 11.O | 0.733850  | 3.153252  | 2.283205  |
| 12.H | 1.394126  | 3.691420  | 2.749519  |
| 13.O | 0.738459  | 4.428516  | -0.150161 |

|      |           |           |           |
|------|-----------|-----------|-----------|
| 14.H | -0.072652 | 4.902892  | 0.094817  |
| 15.O | -1.780232 | 0.236797  | -1.799888 |
| 16.C | -1.165810 | -0.321188 | -2.764613 |
| 17.H | -1.669603 | -0.475195 | -3.732436 |
| 18.O | 0.052273  | -0.704396 | -2.623140 |
| 19.O | -0.521091 | -1.340385 | 0.847998  |
| 20.C | -0.925610 | -1.860038 | 2.031738  |
| 21.O | -0.846263 | -3.027305 | 2.323502  |
| 22.H | -1.343407 | -1.082789 | 2.702779  |

### 2-(\eta<sup>2</sup>-O<sub>2</sub>CH)<sub>2</sub>

|      |           |           |           |
|------|-----------|-----------|-----------|
| 1.Si | 0.058834  | 0.018922  | -0.060906 |
| 2.O  | 1.709144  | 0.044359  | -0.057666 |
| 3.O  | -0.582657 | 1.537660  | -0.102896 |
| 4.O  | -0.574272 | -0.688385 | 1.288477  |
| 5.O  | -0.335225 | -0.814619 | -1.425554 |
| 6.Si | -1.227552 | -0.447206 | -2.761282 |
| 7.O  | -1.972128 | 1.011691  | -2.580509 |
| 8.Zr | -1.937346 | 2.436681  | -1.215889 |
| 9.O  | -0.289920 | -0.300950 | -4.111775 |
| 10.O | -2.312784 | -1.685885 | -2.870944 |
| 11.C | -4.334790 | 2.439918  | -0.193954 |
| 12.O | -0.573491 | 3.844829  | -2.248258 |
| 13.H | -2.830581 | -1.691551 | -3.692449 |
| 14.H | 0.377056  | -0.998278 | -4.219533 |
| 15.H | 2.103989  | 0.423320  | 0.744416  |
| 16.H | -0.406885 | -1.641710 | 1.367678  |
| 17.C | -1.198714 | 4.877023  | -1.805789 |
| 18.H | -0.833497 | 5.881055  | -2.076138 |
| 19.O | -2.222358 | 4.737785  | -1.071594 |
| 20.O | -4.197034 | 2.492636  | -1.459167 |
| 21.O | -3.307787 | 2.393361  | 0.565213  |
| 22.H | -5.348319 | 2.429143  | 0.239759  |

### 1-H...NNO

|      |           |           |           |
|------|-----------|-----------|-----------|
| 1.Zr | -0.010781 | 0.043300  | -0.023209 |
| 2.O  | 2.035489  | 0.063980  | -0.035047 |
| 3.Si | 2.794790  | 1.532717  | -0.018035 |
| 4.O  | 2.280537  | 2.343622  | 1.354402  |
| 5.Si | 0.665765  | 2.725760  | 1.466517  |
| 6.O  | 0.277402  | 3.543266  | 0.066247  |
| 7.Si | 0.663216  | 2.815684  | -1.382717 |
| 8.O  | 2.274653  | 2.433333  | -1.317371 |
| 9.O  | -0.215599 | 1.395238  | -1.462198 |
| 10.N | 0.860015  | -2.419149 | 0.096040  |
| 11.N | 1.239812  | -3.488687 | 0.147994  |
| 12.O | 1.636546  | -4.611583 | 0.201417  |
| 13.H | -1.364330 | -1.293528 | -0.060257 |
| 14.O | -0.205530 | 1.308746  | 1.479325  |

|      |           |          |           |
|------|-----------|----------|-----------|
| 15.O | 4.426867  | 1.446909 | -0.097778 |
| 16.O | 0.293540  | 3.564039 | 2.817150  |
| 17.O | 0.370393  | 3.808050 | -2.647558 |
| 18.H | 0.693555  | 4.445470 | 2.892540  |
| 19.H | -0.368856 | 3.539203 | -3.215409 |
| 20.H | 4.825489  | 0.701011 | 0.377687  |

## 2-H...NNO

|      |           |           |           |
|------|-----------|-----------|-----------|
| 1.Zr | 0.248024  | -0.166787 | -0.110963 |
| 2.O  | 2.199189  | 0.074709  | 0.012613  |
| 3.Si | 3.109879  | 1.448489  | 0.048871  |
| 4.O  | 2.159163  | 2.775323  | 0.278842  |
| 5.Si | 0.544435  | 3.076114  | 0.369824  |
| 6.O  | -0.326883 | 1.675576  | 0.264812  |
| 7.O  | 0.250459  | 4.091265  | -0.896625 |
| 8.O  | 0.120787  | 3.727863  | 1.823222  |
| 9.O  | 4.148842  | 1.477043  | 1.328822  |
| 10.O | 3.884087  | 1.495331  | -1.406020 |
| 11.N | -1.673751 | -1.674325 | -0.476761 |
| 12.N | -2.533436 | -2.416019 | -0.555035 |
| 13.O | -3.429953 | -3.199147 | -0.612788 |
| 14.H | -0.016817 | -0.501952 | -1.941613 |
| 15.H | -0.140681 | -1.293937 | 1.347198  |
| 16.H | 4.325678  | 2.336071  | -1.608939 |
| 17.H | 4.859829  | 0.817191  | 1.284569  |
| 18.H | 0.654692  | 4.489587  | 2.102599  |
| 19.H | -0.657783 | 4.432466  | -0.940751 |
